# Supplementary material
Source: Springer Nature journal article supplement (https://www.springermedizin.de/resource/supplementary/12885_2013_4032_MOESM2_ESM.pdf/9465056)
Supplement: MOESM2 [file 9465056]

Records identified through PubMed database searching  
n=108

Records identified through SCIE database searching  
n=34

Excluded based on title or abstract

1. The subjects were in Hong Kong, Taiwan, Macao and other foreign country (n=19)
2. Caregivers (n=1)
3. The subjects were non-cancerous samples (n=1)
4. Studies were case study or reviews (n=5).
5. Studies were not relevant to our topic (n=8).
6. Younger than age 18 (n=5)

Excluded based on title or abstract

1. The subjects were in Hong Kong, Taiwan, Macao and other foreign country (n=1)
2. Caregivers (n=1)
3. Studies were case study or reviews (n=5).
4. Studies were not relevant to our topic (n=5).

Full-text retrieved  
n=69

Full-text retrieved  
n=22

Full-text articles after duplicates removed  
n=75

Exclude: Did not include non-cancer control group (n=47)

Exclude: Case study/qualitative research/reviews (n=2)

Exclude: Subjects were in Hong Kong/Taiwan (n=6)

Exclude: Subject were not cancer (e.g., CHD/HPV) (n=6)

Exclude: Not report the prevalence of depression/anxiety (n=6)

Exclude: Studies were not relevant to our topic (n=2)

Exclude: RCT (n=6)
